# Supplementary material for: Rapid corticosteroid taper versus standard of care for immune checkpoint inhibitor induced nephritis: a single-center retrospective cohort study
Source: PubMed Central journal article supplement — J Immunother Cancer. 2021 Apr 13;9(4):e002292. doi: 10.1136/jitc-2020-002292 (PMC8051410; doi:10.1136/jitc-2020-002292), 2021-04-13
Supplement: jitc-2020-002292supp001.pdf [file jitc-2020-002292supp001.pdf]

**Supplemental table 1. Protocol for rapid corticosteroid taper for ICI-induced nephritis**

Permanently discontinue AIN-associated medications (PPI, allopurinol, NSAIDS, antibiotics)

Temporarily hold ICI

Begin prednisone 1mg/kg/day

In hospitalized patients, consider 1-3 days of intravenous methylprednisolone

Repeat creatinine in 5-7 days provided creatinine is improving by  $\geq 25\%$ , continue rapid taper

Rapid corticosteroid taper: 40mg x 3 days, 30mg x 3 days, 20mg x 3 days, 10mg daily

Repeat creatinine every 7 days and continue taper as long as creatinine continues to decline.

If creatinine rises, restart 60mg day and taper over 4-6 weeks

If requiring corticosteroid  $\geq 20$ mg/day prednisone equivalent for  $> 14$  days consider adding atovaquone for PJP prophylaxis

Use H2 blocker for gastric ulcer prophylaxis

Counsel patient to avoid NSAIDS and over-the-counter PPI

Supplemental Table 1 Abbreviations: AIN = acute interstitial nephritis, PPI = proton pump inhibitor, NSAIDS = nonsteroidal anti-inflammatory drugs, ICI = immune checkpoint inhibitor, PJP = *Pneumocystis jirovecii* pneumonia, H2 = histone 2

**Supplemental Figure 1. Time to renal recovery among patients exposed to AIN-associated medications compared to those who did not receiving AIN meds during their corticosteroid taper.**

**Supplemental Figure 1.** Recovery of ICI-induced nephritis was defined as serum creatinine returning to less than 1.5 times the baseline creatinine. AIN-associated medications, including proton pump inhibitors or trimethoprim-sulfamethoxazole were given to 11 patients and 16 did not have exposure to AIN-associated medications. Curves are plotted as 1-survival probability and compared via log-rank test.

**Supplemental Table 2: Effect of discontinuation of AIN meds on time to recovery stratified by treatment group**

| Treatment group               | N  | Days to recovery, mean (SD) |
|-------------------------------|----|-----------------------------|
| <u>Rapid Taper*</u>           |    |                             |
| Ongoing AIN-med exposure**    | 2  | 16 (3)                      |
| No exposure to AIN meds       | 10 | 16 (20)                     |
| <u>Standard of Care Taper</u> |    |                             |
| Ongoing AIN-med exposure      | 9  | 72 (74)                     |
| No exposure to AIN meds       | 5  | 39 (23)                     |

\*One patient in the rapid taper group did not achieve renal recovery, this patient was not exposed to AIN-meds.

\*\*One patient in the rapid-taper group who was exposed to AIN-meds achieve remission but then relapsed
