# Supplementary figures and images for: Rapid corticosteroid taper versus standard of care for immune checkpoint inhibitor induced nephritis: a single-center retrospective cohort study
Source: PubMed Central journal article supplement — J Immunother Cancer. 2021 Apr 13;9(4):e002292. doi: 10.1136/jitc-2020-002292 (PMC8051410; doi:10.1136/jitc-2020-002292), 2021-04-13

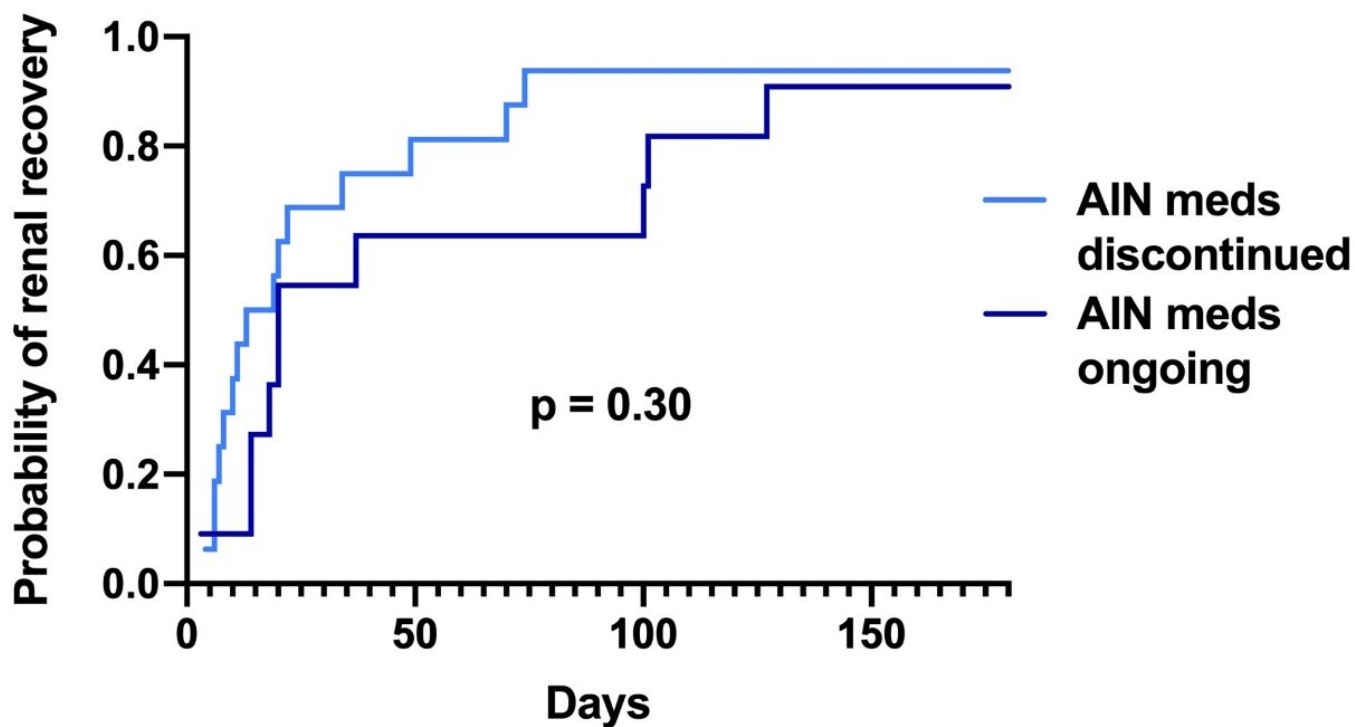

Supplement: jitc-2020-002292supp002.pdf [file jitc-2020-002292supp002.pdf]
